# Supplementary material for: Sequential action of FRUITFULL as a modulator of the activity of the floral regulators SVP and SOC1
Source: PubMed Central journal article supplement (PMC3935574; doi:10.1093/jxb/ert482), 2014-01-24
Supplement: supp_ert482_Balanza_SUPPLEMENTARY_MATERIAL_new.pdf [file supp_ert482_Balanza_SUPPLEMENTARY_MATERIAL_new.pdf]

SUPPLEMENTARY MATERIAL

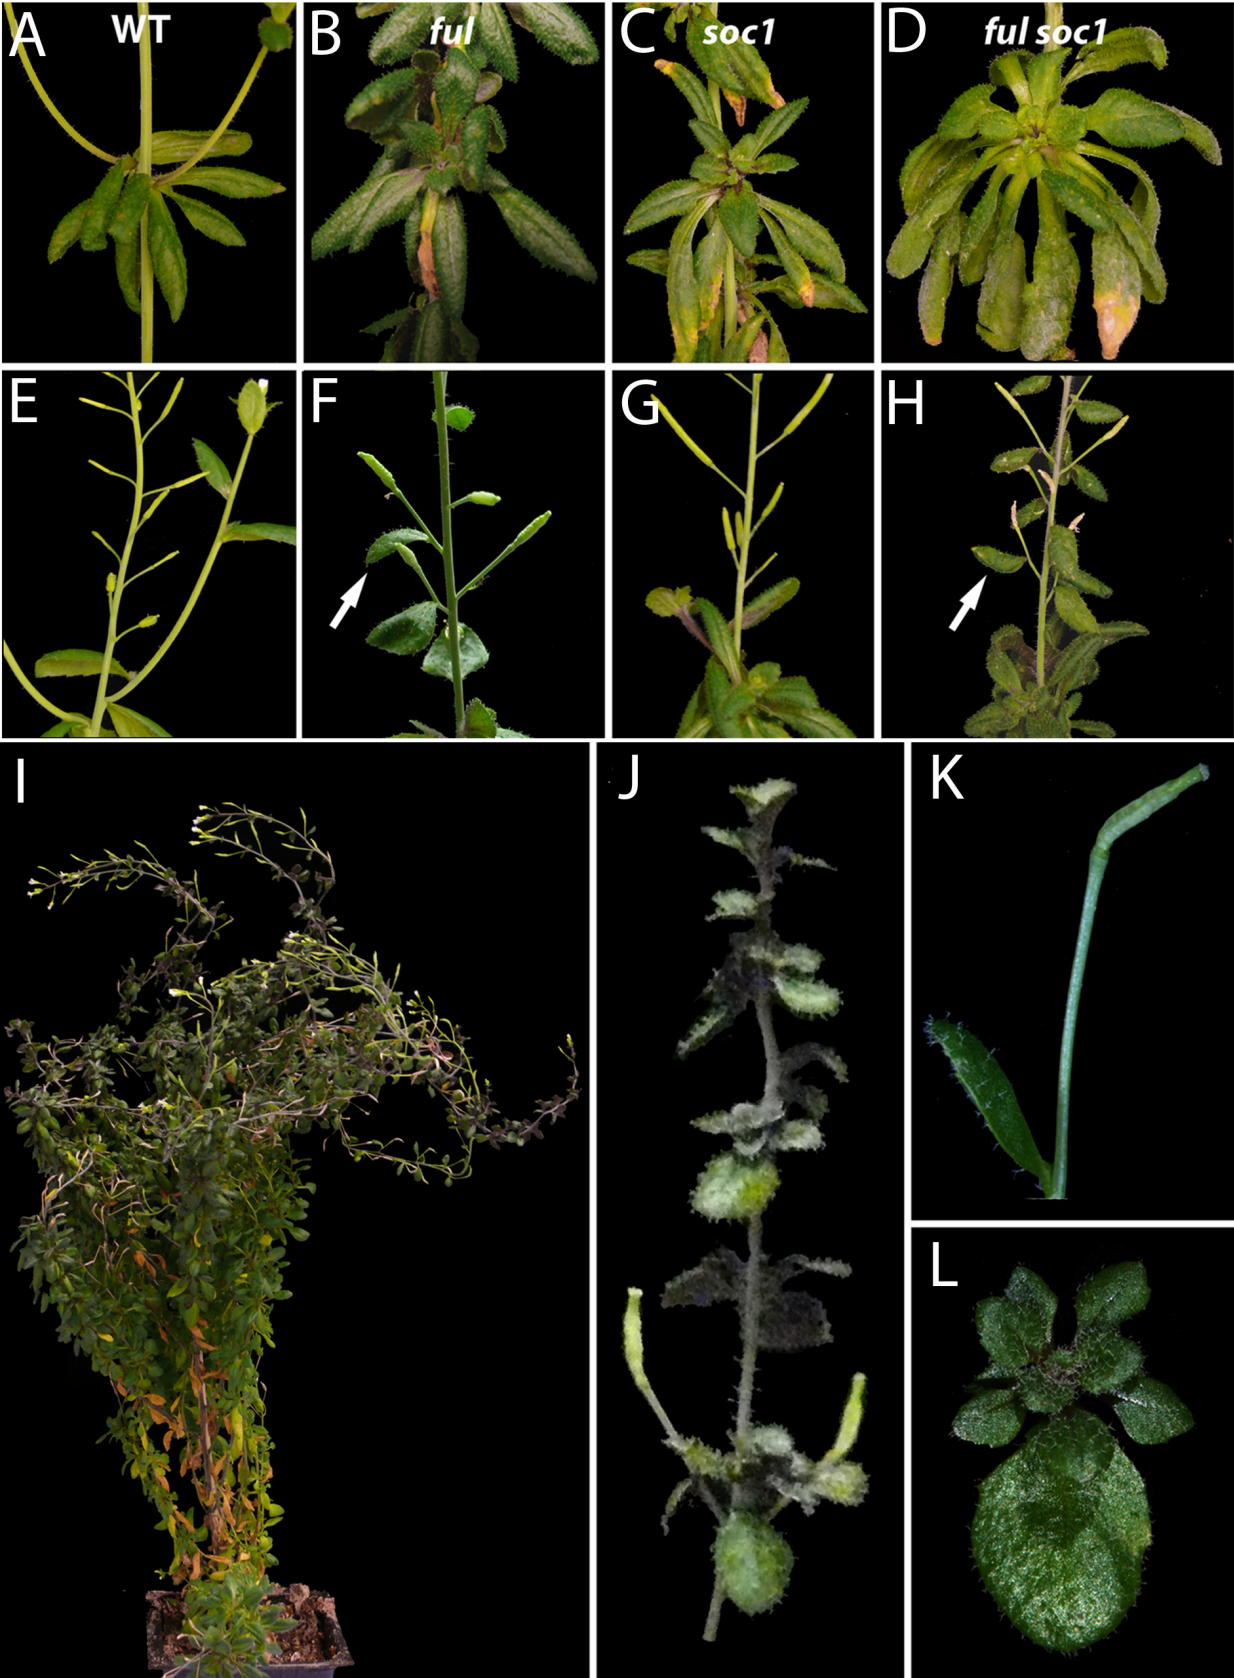

**Supplementary figure 1: Inflorescence phenotypes of *ful*, *soc1* and *ful soc1* double mutant.**

A-D. Vegetative development of axillary meristems at cauline leaf positions in SD conditions. Axillary meristems in wild type plants produce 2-3 leaves some leaves before the bolting of the secondary inflorescence (A) while *ful*, *soc1* and the double *ful soc1* mutant generate dense aerial rosettes. E-H. Phenotypes of the first flowers produced by the SAM in SD conditions. While wild type (E) and *soc1* (G) mutants develop normal flowers, *ful* (F) and *ful soc1*(H) mutants generate flowers subtended by a leaf-like organ (arrows). I-L. *ful soc1* double mutant grown in LD conditions: Whole plant phenotype (I), reversion of the SAM (J), fruit subtended by a leaf (K) similar to *ful* and *ful soc1* mutants grown in SD conditions (F and H), and aerial rosette developed at the axil of a cauline leaf (L).

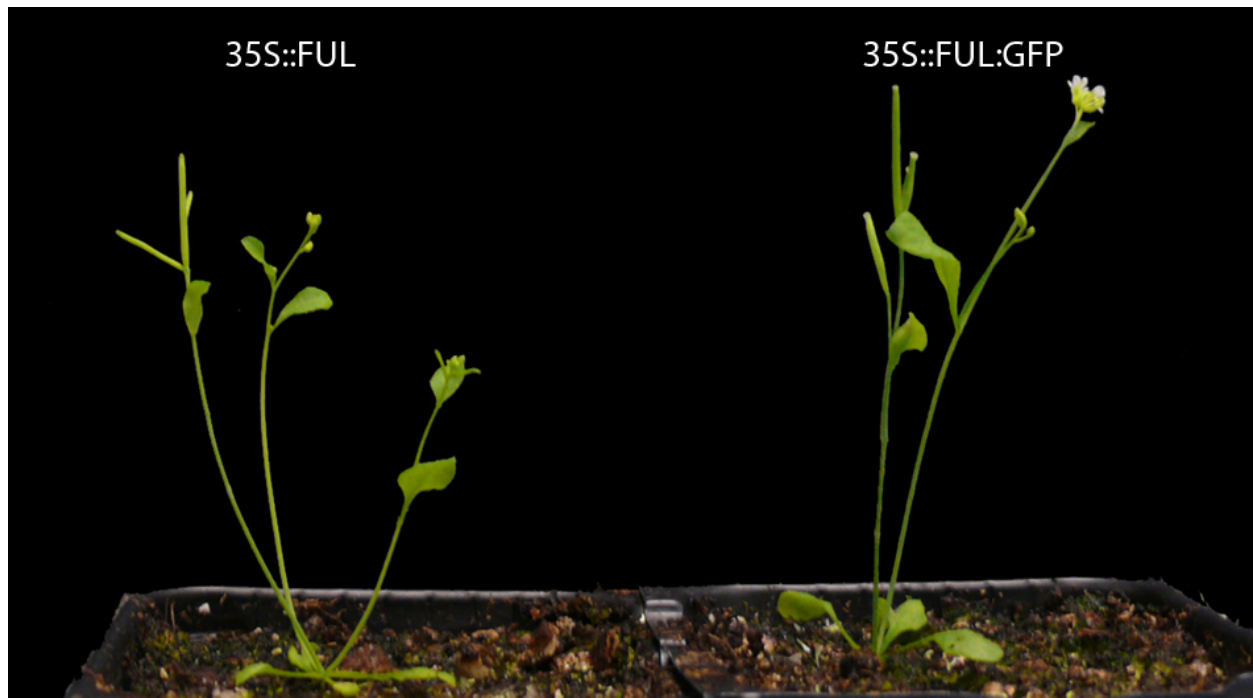

**Supplementary figure 2: Plants used in the ChIP experiments.**

35S::FUL (right) and 35S::FUL:GFP (left) plants are phenotypically identical, indicating that the GFP fusion does not modify significantly the function of the FUL protein.

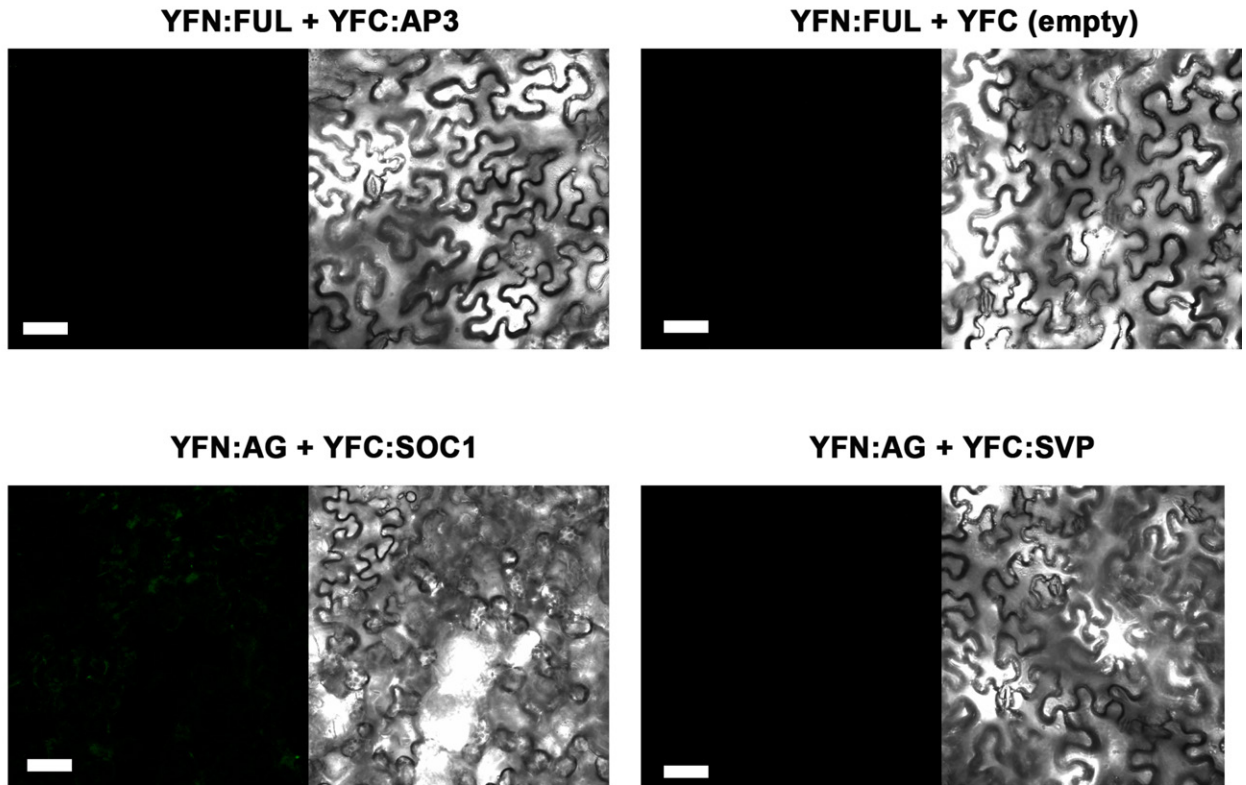

**Supplementary figure 3: Negative controls for BiFC experiments.**

The YFN:FUL construct was coinfiltrated with a vector with the YFC domain not fused to additional protein domains or with a vector containing a YFC:APETALA3 (YFC:AP3) coding sequence. AP3 is a MADS-box gene and therefore shares structural similarities with SOC1 or SVP. In both cases, no reconstituted fluorescence was observed. Likewise, YFC:SVP and YFC:SOC1 were coinfiltrated with YFN:AGAMOUS (YFN:AG), also a MADS-box gene, and no fluorescence signal was detected.

Supplementary Table 1. Primers used in ChIP experiment

| Name                                 | Sequence 5'-3'               |         | Position from ATG |             |
|--------------------------------------|------------------------------|---------|-------------------|-------------|
| LFY-1f                               | CTATACGACGTCGTTTGAAAGGGATCC  | forward | -2311 a -2285     | LEAFY       |
| LFY-1r                               | GCGTTTATATCTTCTCGGTCAGCCCA   | reverse | -2205 a -2180     | LEAFY       |
| LFY-2f                               | TATCTTCCCCTAACAATACTTCCAAAGC | forward | -1045 a -1018     | LEAFY       |
| LFY-2r                               | TCTTTGCAGAAGCCCGATAAGTTACT   | reverse | -940 a -915       | LEAFY       |
| SOC1-1f                              | TATATCGGGAGGAGGACCACAC       | forward | -1805 a -1784     | SOC1        |
| SOC1-1r                              | ATCCATACAGATTTTCGGACCT       | reverse | -1703 a -1682     | SOC1        |
| SOC1-2f                              | TGGACGCTTGAAACCTCATCCT       | forward | -1028 a -1007     | SOC1        |
| SOC1-2r                              | GGGAGGGAAAAAGATGTGTATG       | reverse | -936 a -915       | SOC1        |
| SOC1-3f                              | GCAAAAGAAGTAGCTTTCCTCG       | forward | -752 a -730       | SOC1        |
| SOC1-3r                              | AGCAGAGAGAGAAGAGACGAGTG      | reverse | -678 a -657       | SOC1        |
| SOC1-4f                              | GGATGCAACCTCCTTTCATGAG       | forward | -396 a -375       | SOC1        |
| SOC1-4r                              | ATATGGGTTTGGTTTCATTTGG       | reverse | -339 a -318       | SOC1        |
| SOC1-5f                              | ATCACATCTCTTTGACGTTTGCTT     | forward | 310 a 333         | SOC1        |
| SOC1-5r                              | GCCCTAATTTTGCAGAAACCAA       | reverse | 359 a 380         | SOC1        |
| SOC1-6f                              | TGTTTCAGACATTTGGTCCATTTG     | forward | 940 a 963         | SOC1        |
| SOC1-6r                              | AGTCTTGTACTTTTTCCCCCTATTTTAG | reverse | 1029 a 1056       | SOC1        |
| ACT f                                | CGTTTCGCTTTCCTTAGTGTTAGCT    | forward | -657 a -633       | ACTIN7      |
| ACT r                                | AGCGAACGGATCTAGAGACTCACCTTG  | reverse | -550 a -524       | ACTIN7      |
| UBQ10f                               | GGCCTTGTATAATCCCTGATGAATAAG  | forward | 1446 a 1472       | UBIQUITIN10 |
| UBQ10r                               | AAAGAGATAACAGGAACGGAAACATAGT | reverse | 1479 a 1506       | UBIQUITIN10 |
| Primers used for qRT-PCR experiments |                              |         |                   |             |
| TIP41-like                           | GTGAAAAGTGTGGAGAGAAGCAA      | forward |                   | TIP41-like  |
| TIP41-like                           | TCAACTGGATACCCTTTCGCA        | reverse |                   | TIP41-like  |
| LFYf                                 | TCCACTGCCTAGACGAAGAAGC       | forward |                   | LFY         |
| LFYr                                 | TCCCAGCCATGACGACAAGC         | reverse |                   | LFY         |
| FLCf                                 | CGTCGCTCTTCTCGTCGTCTC        | forward |                   | FLC         |
| FLCr                                 | TTCGGTCTTCTTGGCTCTAGTCAC     | reverse |                   | FLC         |
